# Supplementary material for: Study of Cannabis Oils Obtained from Three Varieties of C. sativa and by Two Different Extraction Methods: Phytochemical Characterization and Biological Activities
Source: MDPI journal article supplement (doi:10.3390/plants12091772), 2023-04-26
Supplement: s1 [file s1]

## Article

# Study of Cannabis Oils Obtained from Three Varieties of *C. sativa* and by Two Different Extraction Methods: Phytochemical Characterization and Biological Activities

Sebastián Pino <sup>1</sup>, Luis Espinoza <sup>2</sup>, Carlos Jara-Gutiérrez <sup>3</sup>, Joan Villena <sup>3</sup>, Andrés F. Olea <sup>4,\*</sup> and Katy Díaz <sup>2,\*</sup>

<sup>1</sup> LABSUN (Laboratorio Sustentable Natural), Valparaíso 2340000, Chile; sebastian.pino@alumnos.usm.cl

<sup>2</sup> Departamento de Química, Universidad Técnica Federico Santa María, Avenida España 1680, Valparaíso 2340000, Chile; luis.espinozac@usm.cl

<sup>3</sup> Laboratorio de Investigación-Estrés Oxidativo, Centro de Investigaciones Biomédicas (CIB), Facultad de Medicina, Universidad de Valparaíso, Viña del Mar 2520000, Chile; carlos.jara@uv.cl (C.J.-G.); joan.villena@uv.cl (J.V.)

<sup>4</sup> Grupo QBAB, Instituto de Ciencias Químicas Aplicadas, Facultad de Ingeniería, Universidad Autónoma de Chile, El Llano Subercaseaux 2801, Santiago 8900000, Chile

\* Correspondence: andres.olea@uautonoma.cl (A.F.O.); kathy.diaz@usm.cl (K.D.); Tel.: +56-32-2652843 (K.D.)

Supplementary Materials: The following are available online at [www.mdpi.com/xxx/s1](http://www.mdpi.com/xxx/s1), **Figure S1**: Chromatograms of *Cannabis* sp. samples (M1-M6) analyzed by high-performance liquid chromatography coupled with ultraviolet spectroscopy (HPLC-UV), quantification of THC and CBD at their respective retention times 8 and 10 min respectively; **Figure S2**: Viability percentage of MCF-7, a breast cancer cell line in presence of different cannabis essential oils a) M2, b) M4, c) M6, d) MCF-10A (control) cell lines in presence of M2.

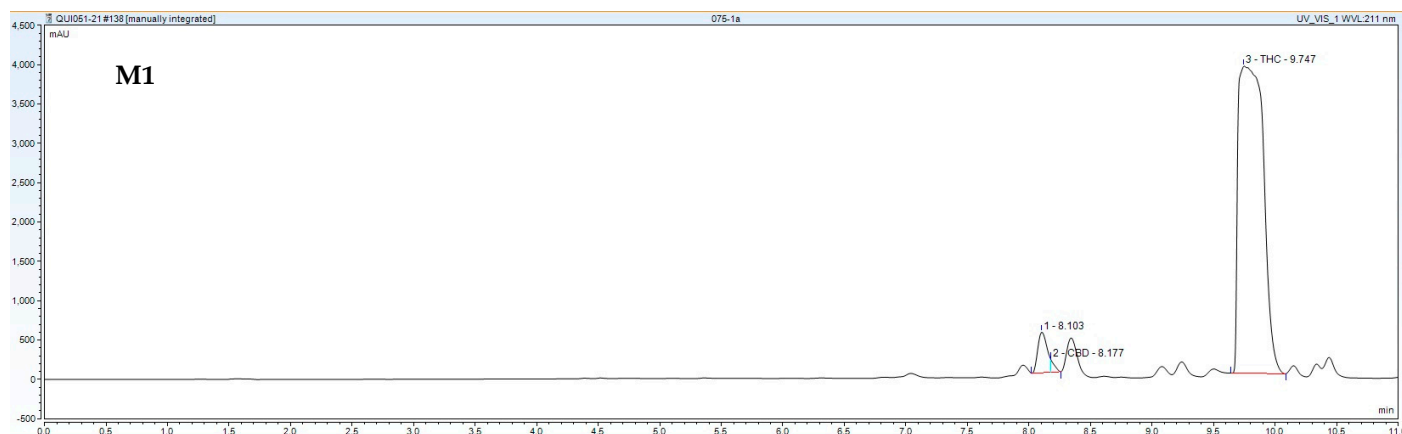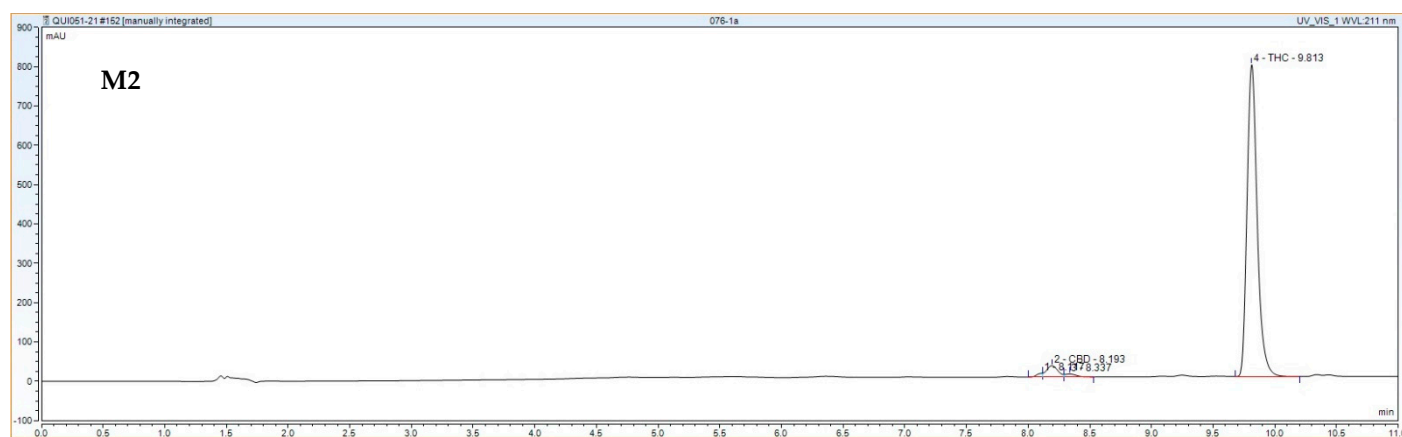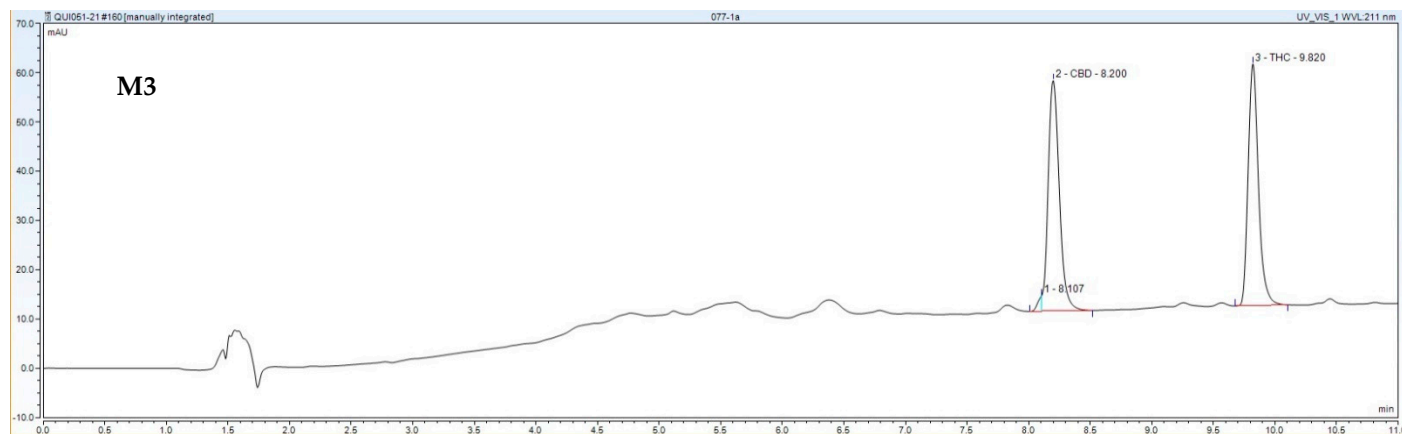

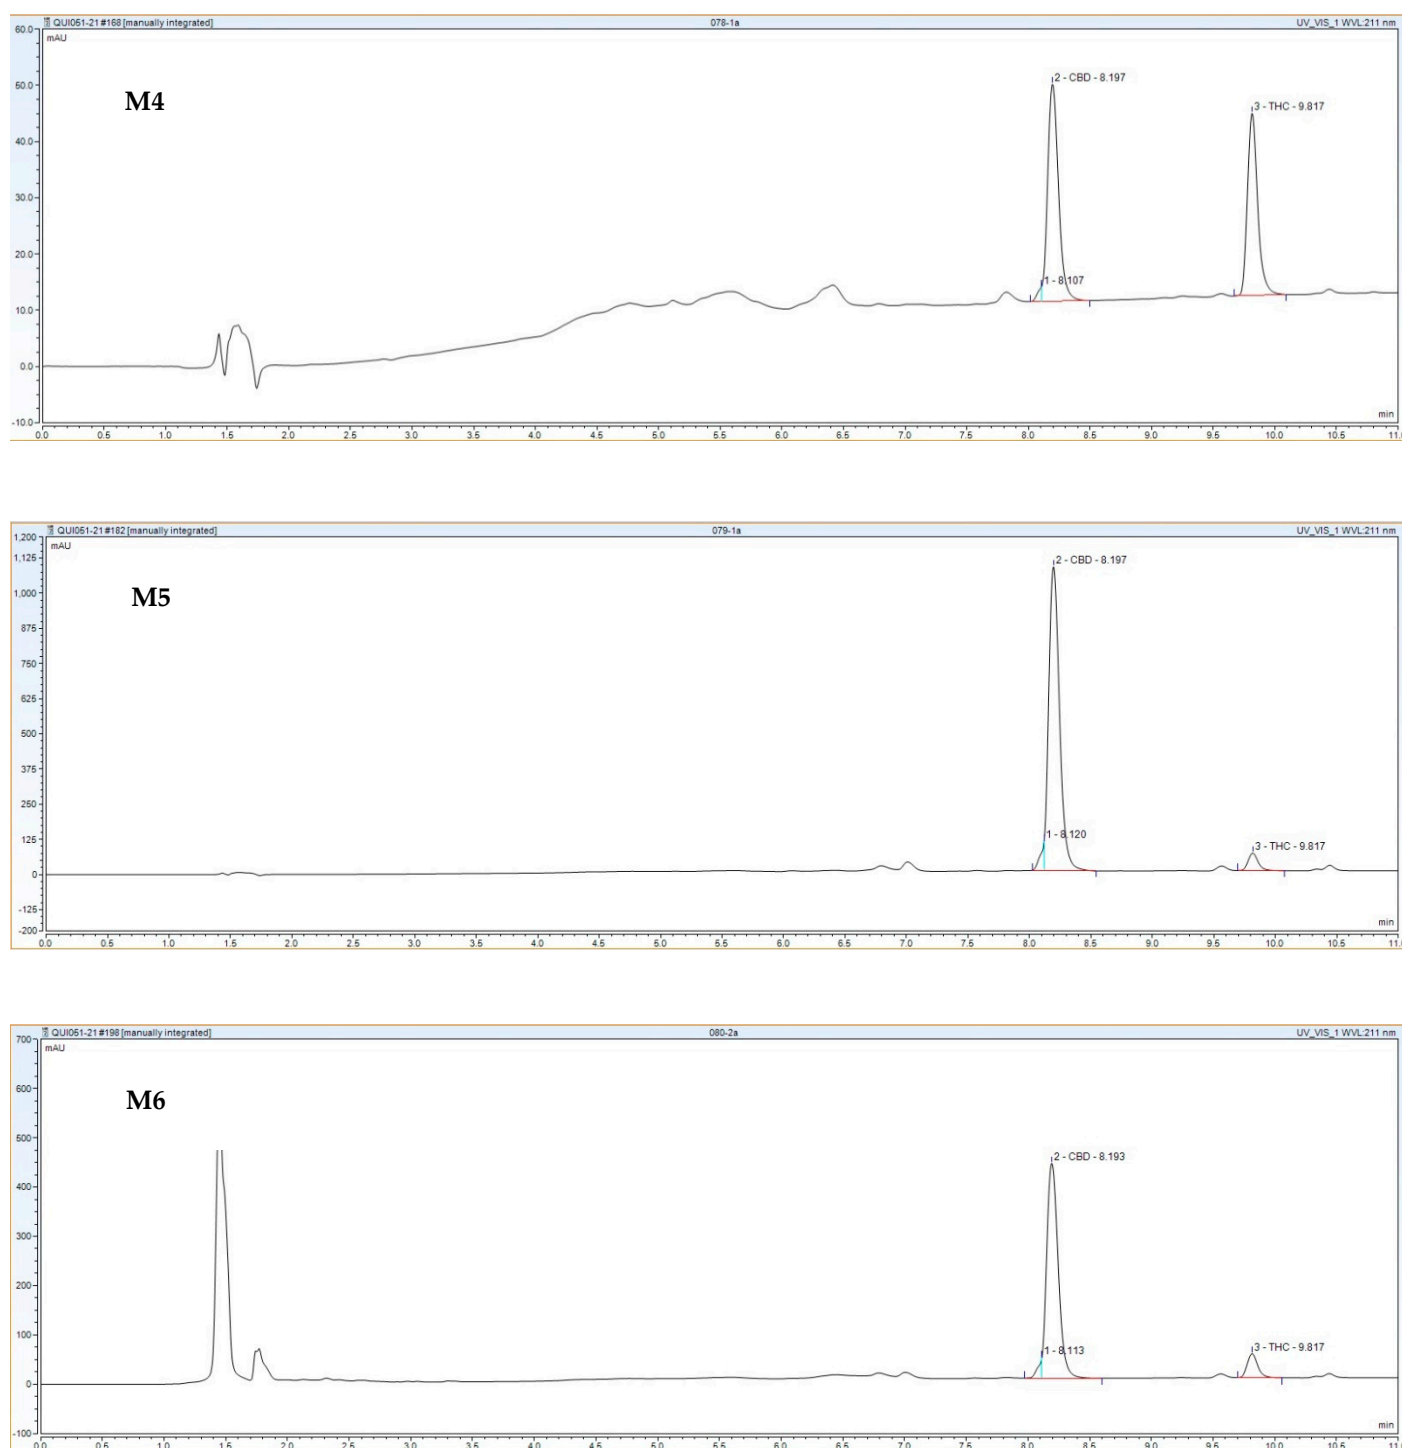

**Figure S1:** Chromatograms of Cannabis sp. samples (M1-M6) analyzed by high-performance liquid chromatography coupled with ultraviolet spectroscopy (HPLC-UV), quantification of THC and CBD at their respective retention times 8 and 10 min respectively.

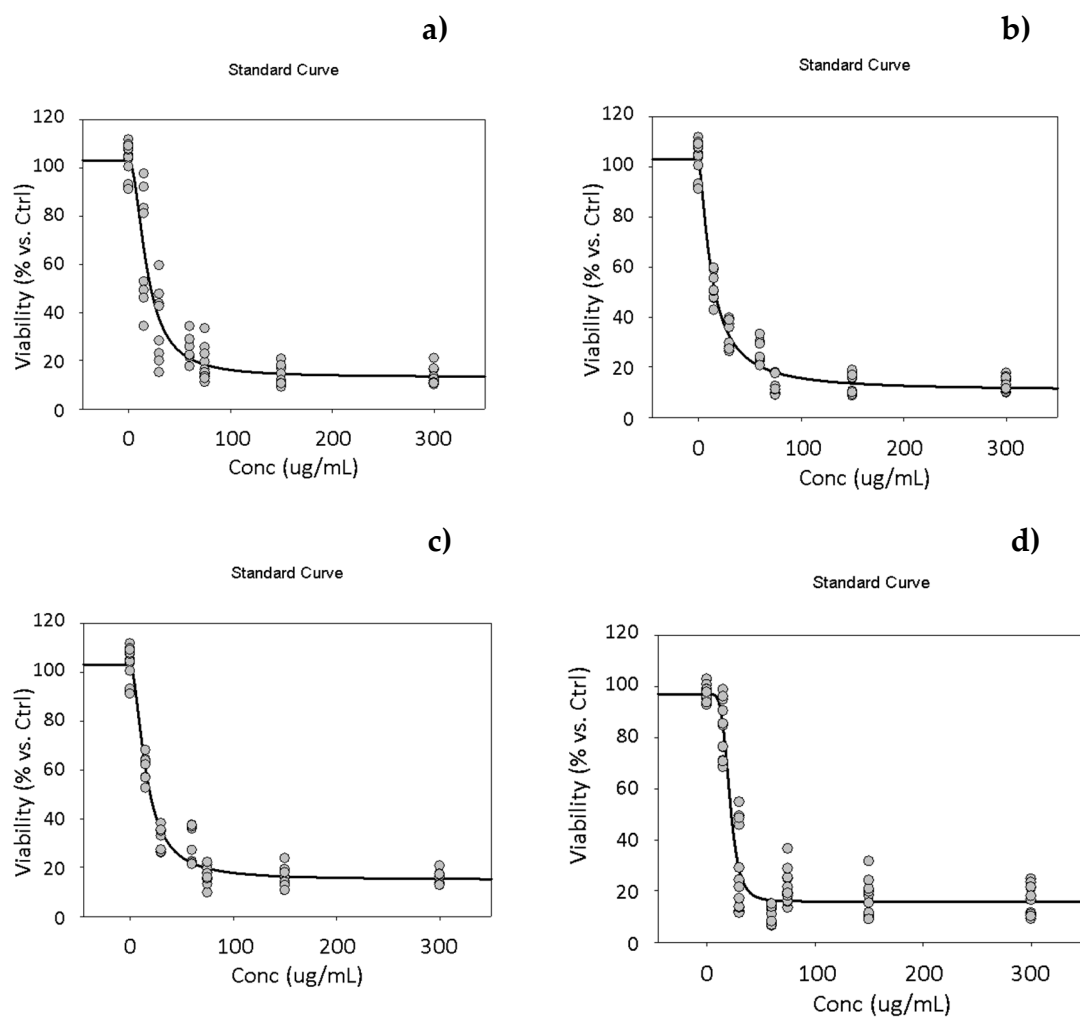

**Figure S2.** Viability percentage of MCF-7, a breast cancer cell line in presence of different cannabis essential oils **a)** M2, **b)** M4, **c)** M6, **d)** MCF-10A (control) cell lines in presence of M2.
